# Supplementary material for: Scavenger Receptor Class B Type 1 Gene Polymorphism as a Possible Genetic Risk Factor for Insulin resistance
Source: Research Square preprint supplement (doi:10.21203/rs.3.rs-2334186/v1), 2022-12-02
Supplement: Supplementary file 1 [file 25a7d2e785077fafecfbade5.docx]

| ***SCARB1***  (***rs74830677)*** | **Controls**  **(N=300)** | **T2DM**  **(N=300)** | **OR**  **(95% CI)** | **P-Value** |
| --- | --- | --- | --- | --- |
| CC | 80 (27%) | 60 (20%) |  |  |
| CT | 107 (35%) | 88 (29%) | 1.09  (0.70-1.6) | 0.7 |
| TT | 113 (38%) | 152 (51%) | 1.7  (1.18-2.71) | ***0.07*** |
| C | 267(44.5%) | 208 (35%) |  |  |
| T | 333 (55.5%) | 392 (65%) |  |  |
| Dominant allele |  |  |  |  |
| CC | 80 | 60 |  |  |
| CT+TT | 220 | 240 | 1.44  (0.99-2.1) | 0.06 |
| Recessive model |  |  |  |  |
| TT+CT | 220 | 240 |  |  |
| TT | 113 | 152 | 1.2  (0.90-1.67) | 1.23 |

OR= Odds Ratio, CI- Confidence Interval, Chi square test (χ2)
