# Supplementary material for: Scavenger Receptor Class B Type 1 Gene Polymorphism as a Possible Genetic Risk Factor for Insulin resistance
Source: Research Square preprint supplement (doi:10.21203/rs.3.rs-2334186/v1), 2022-12-02
Supplement: Supplementary file 2 [file b6273d91b5f14696cd119fc1.docx]

| **Variables** | **Controls (n=300)** | **T2DM**  **(n=300)** | ***OR (95% CI) P*** |
| --- | --- | --- | --- |
| Age (years) | 41.2±5.4 | 48.5±6.2 | 0.001** |
| BMI (kg/m2) | 23.4±3.2 | 24.6±4.1 | 0.001** |
| HDL (mg/dL) | 47.4 ± 6.6 | 39.5 ± 5.5 | 0.001* |
| LDL (mg/dL) | 96.3 ± 12.7 | 123.2 ± 17.4 | 0.001* |
| VLDL (mg/dL) | 37.5 ±9.3 | 41.3 ± 6.5 | ***ns*** |
| TG (mg/dL) | 121.6 ± 9.2 | 156.2 ± 31.2 | ***ns*** |
| TC (mg/dL) | 145.4±18.5 | 178.2±31.3 | ***ns*** |
| FBG (mg/dL) | 73.4 ± 9.2 | 110.2 ± 13.4 | ***ns*** |
| HbA1c (%) | 5.6 ± 0.7 | 7.3 ± 0.99 | 0.001* |
| Serum Insulin (µIU/mL) | 7.5± 2.32 | 22.43± 12.4 | 0.001** |
| HOMA-IR | 2.1±0.11 | 4.1±1.4 | 0.001* |
| QUICKI | 0.377± 0.031 | 0.315± 0.039 | 0.01* |

Values are mean ± SD, * represents P< 0.05, ** P< 0.005.

aMann–Whitney U test

BMI: body mass index; HDL: high density lipoprotein; LDL: low density lipoprotein; VLDL: very low-density lipoprotein; HOMA-IR: homeostasis model assessment -Insulin resistance.

| Values are mean ±SD, *=P ≤ 0.05, HDL- high density lipoprotein, LDL- low density lipoprotein, VLDL- very low-density lipoprotein, TG- triglycerides, FBS- fasting blood sugar, HbA1c- glycated hemoglobin, HOMA-IR- homeostasis model assessment insulin resistance, QUICKI-quantitative insulin-sensitivity check index |
| --- |
