# Supplementary material for: Scavenger Receptor Class B Type 1 Gene Polymorphism as a Possible Genetic Risk Factor for Insulin resistance
Source: Research Square preprint supplement (doi:10.21203/rs.3.rs-2334186/v1), 2022-12-02
Supplement: Supplementary file 3 [file e46c019ab410f069534265d5.docx]

| Biochemical parameters |  | Control | (n=300) |  |
| --- | --- | --- | --- | --- |
| **SCARB1 (*rs74830677)*** | **CC (n=60)** | **CT (n=88)** | **TT (n=152)** | *P- Value1* |
| LDL (mg/dL) | 120.3±34.3 | 123±31.3 | 127.1±33.2 | 0.35 |
| VLDL (mg/dL) | 33.5±12.3 | 30.5±15.2 | 37.3±14.3 | 0.01* |
| TC (mg/dL) | 140±43.4 | 141.3±41.2 | 145.6±39.2 | 0.57 |
| TG (mg/dL) | 122.4±37.3 | 126±34.3 | 121±33.2 | 0.5 |
| HDL (mg/dL) | 43.4±13.1 | 39.5±13.2 | 37.2±12.4 | 0.03* |
| HOMA-IR | 2.1±0.07 | 1.9±0.08 | 2.3±0.93 | 0.36 |
| Serum Insulin (µIU/mL) | 15.6±2.5 | 16.4±2.4 | 16.1±2.6 | 0.09 |
| Biochemical parameters |  | T2DM | (n=300) |  |
| **SCARB1 (*rs74830677*)** | **CC (n=80)** | **CT (n=107)** | **TT (n=113)** | *P-Value1* |
| LDL (mg/dL) | 90.4±24.5 | 88.3±27.3 | 96.4±25.1 | 0.04* |
| VLDL (mg/dL) | 37.2±12.4 | 37.3±17.3 | 43.4±13.1 | 0.03* |
| TC (mg/dL) | 155.4±37.3 | 159±41.2 | 163±39.5 | 0.41 |
| TG (mg/dL) | 161±44.3 | 159.2±41.4 | 160±42.2 | 0.95 |
| HDL (mg/dL) | 38.3±20 | 37.3±20.4 | 35.1±16.3 | 0.7 |
| HOMA-IR | 3.1±0.5 | 3.5±0.6 | 4.2±0.8 | 0.001** |
| Serum Insulin (µIU/mL) | 20±7.2 | 19.5±6.5 | 22.5±12.3 | 0.04* |

1ANOVA test, * bold represents *p < 0.05* significant, HDL: high density lipoprotein; TG: triglycerides; TC: total cholesterol; LDL: low density lipoprotein; VLDL: very low-density lipoprotein
